# Supplementary material
Source: publisher figshare collection journal article supplement (https://diabetesjournals.figshare.com/articles/dataset/_/23710308)
Supplement: Supplementary file 1 [file 1]

German Diabetes Study (GDS) Group: H. Al-Hasani, B. Belgardt, G. Bönhof, V. Burkart, A. E. Buyken, G. Geerling, C. Herder, A. Icks, K. Jandeleit-Dahm, J. Kotzka, O. Kuss, E. Lammert, W. Rathmann, V. Schrauwen-Hinderling, J. Szendroedi, S. Trenkamp, R. Wagner, M. Roden.
