# Supplementary material
Source: publisher figshare collection journal article supplement (https://diabetesjournals.figshare.com/articles/dataset/_/23710308)
Supplement: Supplementary file 2 [file 1]

## Supplementary material

**Supplementary table 1. Glucose-lowering medication in type 2 diabetes at baseline and 5-year follow-up.**

| Glucose-lowering medication |                         | Type 2 diabetes<br>(n=39) |           |
|-----------------------------|-------------------------|---------------------------|-----------|
|                             |                         | Baseline                  | Follow up |
| <b>Yes</b>                  |                         | 28 (72%)                  | 33 (85%)  |
|                             | Metformin               | 26 (67%)                  | 29 (74%)  |
|                             | Insulin                 | 4 (10%)                   | 7 (18%)   |
|                             | DPP4 inhibitors         | 2 (5%)                    | 2 (5%)    |
|                             | Sulfonylurea drugs      | 3 (8%)                    | 2 (5%)    |
|                             | GLP-1 receptor agonists | 4 (10%)                   | 9 (23%)   |
|                             | SGLT-2 inhibitors       | 0                         | 10 (26%)  |
| <b>No</b>                   |                         | 11 (28%)                  | 6 (15%)   |

% refers to the whole type 2 diabetes group.

**Supplementary table 2. Detailed protocol for the acquisition of  $^1\text{H}$  magnetic resonance spectroscopy (1H-MRS) data.**

|                                                                                                                                         |                                                                                                                                                                                                                                                                                          |
|-----------------------------------------------------------------------------------------------------------------------------------------|------------------------------------------------------------------------------------------------------------------------------------------------------------------------------------------------------------------------------------------------------------------------------------------|
| 1. Hardware                                                                                                                             |                                                                                                                                                                                                                                                                                          |
| a. Field strength [T]                                                                                                                   | 3T                                                                                                                                                                                                                                                                                       |
| b. Manufacturer                                                                                                                         | Philips                                                                                                                                                                                                                                                                                  |
| c. Model (software version if available)                                                                                                | Achieva dStream 3T                                                                                                                                                                                                                                                                       |
| d. RF coils: nuclei (transmit/ receive), number of channels, type, body part                                                            | $^1\text{H}$ , dStream Torso coil, 32 channels                                                                                                                                                                                                                                           |
| e. Additional hardware                                                                                                                  | no                                                                                                                                                                                                                                                                                       |
| 2. Acquisition                                                                                                                          |                                                                                                                                                                                                                                                                                          |
| a. Pulse sequence                                                                                                                       | Point resolve spectroscopy (PRESS)                                                                                                                                                                                                                                                       |
| b. Volume of Interest (VOI) locations                                                                                                   | Tibialis anterior (Supplementary Figure 1)                                                                                                                                                                                                                                               |
| c. Nominal VOI size [ $\text{cm}^3$ , $\text{mm}^3$ ]                                                                                   | $10 \times 10 \times 20 \text{ mm}^3$                                                                                                                                                                                                                                                    |
| d. Repetition Time (TR), Echo Time (TE) [ms, s]                                                                                         | TR/TE=2000/29 ms                                                                                                                                                                                                                                                                         |
| e. Total number of Excitations or acquisitions per spectrum                                                                             | 16 averages in non-water suppressed spectra with 2 startup acquisitions, 96 averages in water suppressed spectra with 2 startup acquisitions                                                                                                                                             |
| f. Additional sequence parameters (spectral width in Hz, number of spectral points, frequency offsets)                                  | Bandwidth 2000 Hz, 2048 spectral points                                                                                                                                                                                                                                                  |
| g. Water Suppression Method                                                                                                             | Chemical Shift Selective (CHESS) suppression                                                                                                                                                                                                                                             |
| h. Shimming Method, reference peak, and thresholds for “acceptance of shim” chosen                                                      | PB-volume shim, second order, typical linewidth (full width at half maximum, FWHM) of water resonance: 20-25 Hz                                                                                                                                                                          |
| i. Triggering or motion correction method (respiratory, peripheral, cardiac triggering, incl. device used and delays)                   | None                                                                                                                                                                                                                                                                                     |
| 3. Data analysis methods and outputs                                                                                                    |                                                                                                                                                                                                                                                                                          |
| a. Analysis software                                                                                                                    | jMRUI                                                                                                                                                                                                                                                                                    |
| b. Processing steps deviating from quoted reference or product                                                                          | Spectra without water suppression were phase-corrected (zero order phase) and then fitted with AMARES in jMRUI (Gaussian lineshape).<br>Water-suppressed spectra were apodized with 4Hz, phased-corrected (zero order phase), and then fitted with AMARES in JMRUI (Gaussian lineshape). |
| c. Output measure (e.g. absolute concentration, institutional units, ratio) Processing steps deviating from quoted reference or product | Intramyocellular lipid content (IMCL), calculated from the peak areas of IMCL- $\text{CH}_2$ resonance at 1.3 ppm with respect to the water resonance after correction for T1 and T2 relaxation effects.                                                                                 |
| d. Quantification references and assumptions, fitting model assumptions                                                                 | Prior knowledge about relative chemical shifts and relative ratios of linewidth was                                                                                                                                                                                                      |

|                                                                                                     |                                                                                                                                                                                                                                                                    |
|-----------------------------------------------------------------------------------------------------|--------------------------------------------------------------------------------------------------------------------------------------------------------------------------------------------------------------------------------------------------------------------|
|                                                                                                     | applied for the lipid resonances (EMCL-CH <sub>2</sub> , IMCL-CH <sub>2</sub> , EMCL-CH <sub>3</sub> , and IMCL-CH <sub>3</sub> ). All resonances were fitted with AMARES, using a Gaussian lineshapes and the unsuppressed water resonance was used as reference. |
| 4. Data Quality                                                                                     |                                                                                                                                                                                                                                                                    |
| a. Reported variables (SNR, Linewidth (with reference peaks))                                       | SNR and FWHM not reported                                                                                                                                                                                                                                          |
| b. Data exclusion criteria                                                                          | Only spectra with clearly visible separation of EMCL and IMCL peaks were taken into the analysis                                                                                                                                                                   |
| c. Quality measures of postprocessing<br>Model fitting (e.g. CRLB, goodness of fit, SD of residual) | No quality measures described                                                                                                                                                                                                                                      |
| d. Sample Spectrum                                                                                  | Supplementary Figure 1                                                                                                                                                                                                                                             |

**Supplementary table 3. Correlations between intramuscular triglyceride content and selected metabolic parameters across different glycemic groups at baseline and 5-year follow up.**

|                                                                                | Glucose-tolerant controls |                        | Type 1 diabetes         |                  | Type 2 diabetes            |                        |
|--------------------------------------------------------------------------------|---------------------------|------------------------|-------------------------|------------------|----------------------------|------------------------|
|                                                                                | Baseline (n=128)          | Follow up (n=20)       | Baseline (n=132)        | Follow up (n=27) | Baseline (n=139)           | Follow up (n=38)       |
| Blood glucose (mg/dl)                                                          | r=-0.03, p=0.705          | r=-0.26, p=0.324       | r=0.09, p=0.319         | r=0.23, p=0.252  | <b>r=0.21, p=0.012</b>     | r=0.03, p=0.892        |
| HbA1c (NGSP, %)                                                                | r=0.04, p=0.429           | r=-0.24, p=0.302       | r=0.24, p=0.118         | r=-0.11, p=0.780 | r=0.25, p=0.087            | r=0.15, p=0.578        |
| Total cholesterol (mg/dl)                                                      | r=0.13, p=0.159           | r=-0.09, p=0.699       | <b>r=0.19, p=0.032</b>  | r=0.19, p=0.331  | r=0.09, p=0.289            | r=0.30, p=0.112        |
| FFA ( $\mu\text{mol/l}$ )                                                      | r=-0.11, p=0.213          | r=-0.47, p=0.043       | r=0.06, p=0.558         | r=-0.06, p=0.775 | r=0.09, p=0.319            | r=-0.19, p=0.318       |
| Insulin sensitivity ( $\text{mg} \cdot \text{kg}^{-1} \cdot \text{min}^{-1}$ ) | r=-0.06, p=0.350          | r=-0.13, p=0.611       | <b>r=-0.21, p=0.003</b> | r=-0.03, p=0.894 | <b>r=-0.32, p&lt;0.001</b> | r=-0.06, p=0.552       |
| ADIPO-IR (a.u.)                                                                | r=0.06, p=0.701           | r=-0.17, p=0.791       | r=0.28, p=0.122         | r=-0.92, p=0.080 | <b>r=0.49, p=0.001</b>     | r=0.07, p=0.825        |
| Whole body adipose tissue volume ( $\text{cm}^3$ )                             | r=0.15, p=0.113           | r=0.27, p=0.333        | r=0.20, p=0.092         | r=0.08, p=0.698  | <b>r=0.24, p=0.041</b>     | r=0.14, p=0.543        |
| Subcutaneous adipose tissue volume ( $\text{cm}^3$ )                           | r=0.13, p=0.174           | r=0.23, p=0.408        | r=0.19, p=0.110         | r=0.09, p=0.689  | r=0.22, p=0.053            | r=-0.07, p=0.764       |
| Visceral adipose tissue volume ( $\text{cm}^3$ )                               | r=0.16, p=0.089           | r=0.46, p=0.086        | r=0.01, p=0.913         | r=0.04, p=0.858  | r=0.11, p=0.353            | <b>r=0.62, p=0.003</b> |
| Skeletal muscle volume ( $\text{cm}^3$ )                                       | r=0.14, p=0.165           | r=0.36, p=0.183        | r=0.05, p=0.601         | r=-0.14, p=0.592 | r=-0.08, p=0.469           | r=0.08, p=0.716        |
| RQbasal (a.u.)                                                                 | r=-0.03, p=0.748          | r=0.06, p=0.817        | r=0.14, p=0.137         | r=0.38, p=0.066  | r=0.02, p=0.775            | r=0.05, p=0.811        |
| RQclamp (a.u.)                                                                 | r=-0.08, p=0.368          | r=-0.18, p=0.528       | <b>r=-0.24, p=0.008</b> | r=-0.10, p=0.670 | r=-0.07, p=0.402           | r=0.08, p=0.710        |
| REEbasal (kcal/day)                                                            | r=0.17, p=0.054           | r=0.45, p=0.083        | r=0.05, p=0.574         | r=0.13, p=0.557  | r=0.02, p=0.820            | r=0.21, p=0.314        |
| REEclamp (kcal/day)                                                            | r=0.11, p=0.214           | <b>r=0.59, p=0.027</b> | r=-0.03, p=0.730        | r=0.21, p=0.347  | r=-0.04, p=0.620           | r=0.09, p=0.653        |

Blood sampling was done in overnight fasted participants. Data are shown as correlation coefficient and p value. ADIPO-IR, fasting adipose tissue insulin resistance; FFA, free fatty acids; HbA1c, glycated hemoglobin A1c; RQbasal, respiratory quotient in fasting conditions; RQclamp, respiratory quotient during clamp; REEbasal, resting energy expenditure in fasting conditions; REEclamp, resting energy expenditure during clamp.

**Supplementary table 4. Tridimensional relationship between physical fitness (VO<sub>2</sub>max), intramyocellular lipid content (IMCL), and whole-body insulin sensitivity (M-value) in glucose-tolerant controls and adults with type 1 and type 2 diabetes at baseline.**

|                                  | <b>Glucose-tolerant controls</b><br>(n=128) |      |       | <b>Type 1 diabetes</b><br>(n=132) |      |       | <b>Type 2 diabetes</b><br>(n=139) |             |              |
|----------------------------------|---------------------------------------------|------|-------|-----------------------------------|------|-------|-----------------------------------|-------------|--------------|
|                                  | r                                           | SE   | p     | r                                 | SE   | p     | r                                 | SE          | p            |
| M value                          | -0.10                                       | 3.64 | 0.978 | -2.20                             | 2.59 | 0.782 | <b>-6.54</b>                      | <b>2.66</b> | <b>0.015</b> |
| VO <sub>2</sub> max              | 0.11                                        | 1.15 | 0.925 | -0.27                             | 0.73 | 0.709 | <b>-1.27</b>                      | <b>0.61</b> | <b>0.040</b> |
| M value *<br>VO <sub>2</sub> max | <0.01                                       | 0.47 | 0.999 | 0.24                              | 0.34 | 0.486 | <b>0.81</b>                       | <b>0.35</b> | <b>0.022</b> |

p based on multiple linear regression. VO<sub>2</sub>max, maximal aerobic capacity.

**Supplementary figure 1. Representative voxel location from tibialis anterior muscle (A) and representative spectra of intramyocellular lipid content (IMCL) from glucose-tolerant person (B), individual with type 1 (C) and type 2 (D) diabetes. CON, glucose tolerant controls; IMCL, intramyocellular lipid content; T1D, type 1 diabetes; T2D, type 2 diabetes.**

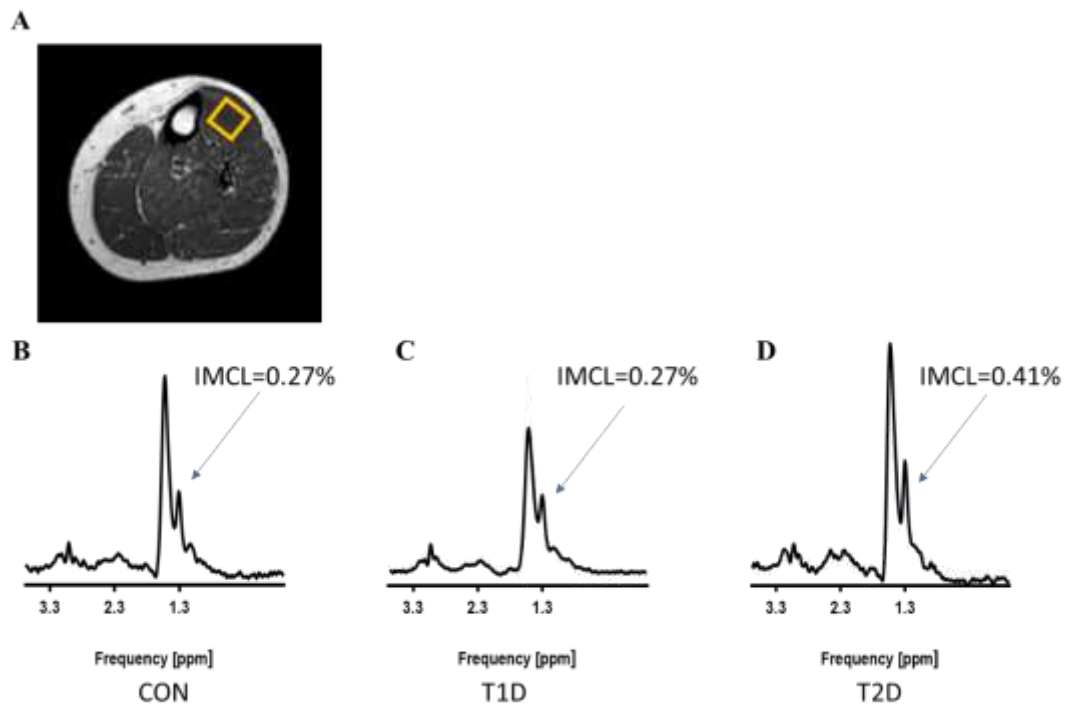

**Supplementary figure 2. Correlation between whole-body insulin sensitivity expressed as M value and when adjusted for plasma insulin levels during clamp steady state (M/I).**

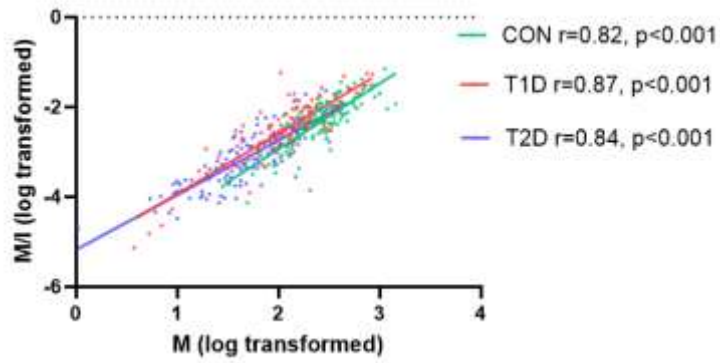

CON, glucose tolerant controls; T1D, type 1 diabetes; T2D, type 2 diabetes.
